# Supplementary material for: In silicoscreening for oligopeptides useful as capture and reporting probes for interleukin-6 biosensing
Source: Royal Society of Chemistry journal article supplement (doi:10.1039/d2ra01496c), 2022-01-01
Supplement: d2ra01496c1.pdf [file d2ra01496c1.pdf]

**Supplementary information**  
**For**  
**In-silico screening for oligopeptides useful as capture and reporting**  
**probes for interleukin-6 biosensing**

Mohamed Mastouri,<sup>a</sup> Sabrine Baachaoui,<sup>b</sup> Amor Mosbah<sup>b</sup> and Nouredine Raouafi<sup>a\*</sup>

<sup>a</sup> Sensors and Biosensors Group, Laboratory of Analytical Chemistry & Electrochemistry (LR99ES15), Faculty of Science, University of Tunis El Manar, 2092 Tunis El Manar, Tunisia.

<sup>b</sup> Laboratory BVBGR (LR11ES31), ISBST, University of Manouba, Biotechnopole Sidi Thabet, Ariana 2020, Tunisia.

\*Corresponding author: email : Nouredine Raouafi ([nouredine.raouafi@fst.utm.tn](mailto:nouredine.raouafi@fst.utm.tn))

|                                                           |    |
|-----------------------------------------------------------|----|
| 1. <b>Selection of the peptides</b> .....                 | 3  |
| Figure S1 .....                                           | 3  |
| 2. <b>Simulation details</b> .....                        | 4  |
| Table S1 .....                                            | 4  |
| 3. <b>Docking</b> .....                                   | 5  |
| Figure S2 .....                                           | 5  |
| 4. <b>RMSD</b> .....                                      | 6  |
| Figure S3 .....                                           | 7  |
| Figure S4 .....                                           | 7  |
| 5. <b>Radius of Gyration</b> .....                        | 8  |
| Figure S5 .....                                           | 8  |
| 6. <b>Hydrogen Bonds</b> .....                            | 9  |
| Table S2 .....                                            | 9  |
| Figure S6 .....                                           | 11 |
| 7. <b>Hydrophobic interactions and salt bridges</b> ..... | 12 |
| Table S3 .....                                            | 12 |
| 8. <b>CTE17/IL-6/CSE25 Sandwich System</b> .....          | 14 |
| Figure S7 .....                                           | 14 |
| Figure S8 .....                                           | 15 |
| 9. <b>Selectivity</b> .....                               | 16 |
| Figure S9 .....                                           | 16 |
| Figure S10 .....                                          | 16 |
| Table S4 .....                                            | 16 |

## 1. Selection of the peptides

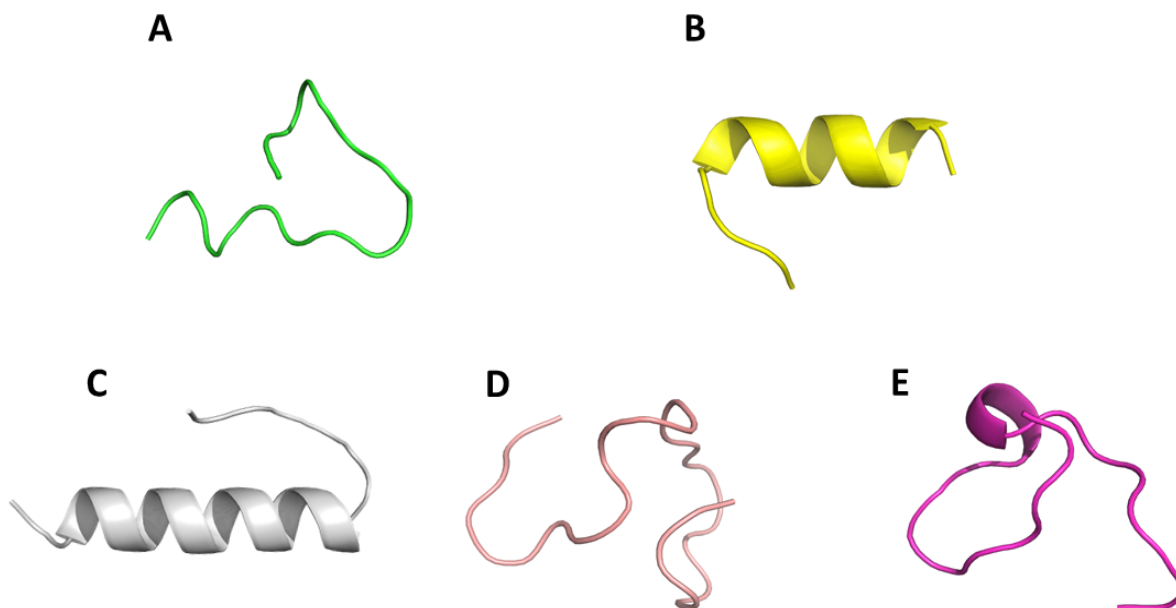

**Figure S1.** The snapshot of secondary structure of the different peptides: (A) CTE17, (B) CAY15, (C) CSE25, (D) CGF24 and (E) SGC20.

## 2. Simulation details

**Table S1.** Simulation details for the IL-6/peptide in solvent environment.

|                                    | <b>System</b> | <b>Box Volume (nm<sup>3</sup>)</b> | <b>Number of Biomolecule Atoms</b> | <b>Water Molecules</b> | <b>Simulation Time (ns)</b> |
|------------------------------------|---------------|------------------------------------|------------------------------------|------------------------|-----------------------------|
| IL6-peptide combination Simulation | CTE17         | 244.71                             | 2925                               | 6498                   | 110                         |
|                                    | CAY15         | 255.25                             | 2971                               | 6762                   | 110                         |
|                                    | CSE25         | 241.54                             | 2936                               | 6404                   | 110                         |
|                                    | CGF24         | 234.38                             | 3032                               | 6137                   | 110                         |
|                                    | SGC20         | 243.32                             | 3107                               | 6333                   | 110                         |

### 3. Docking

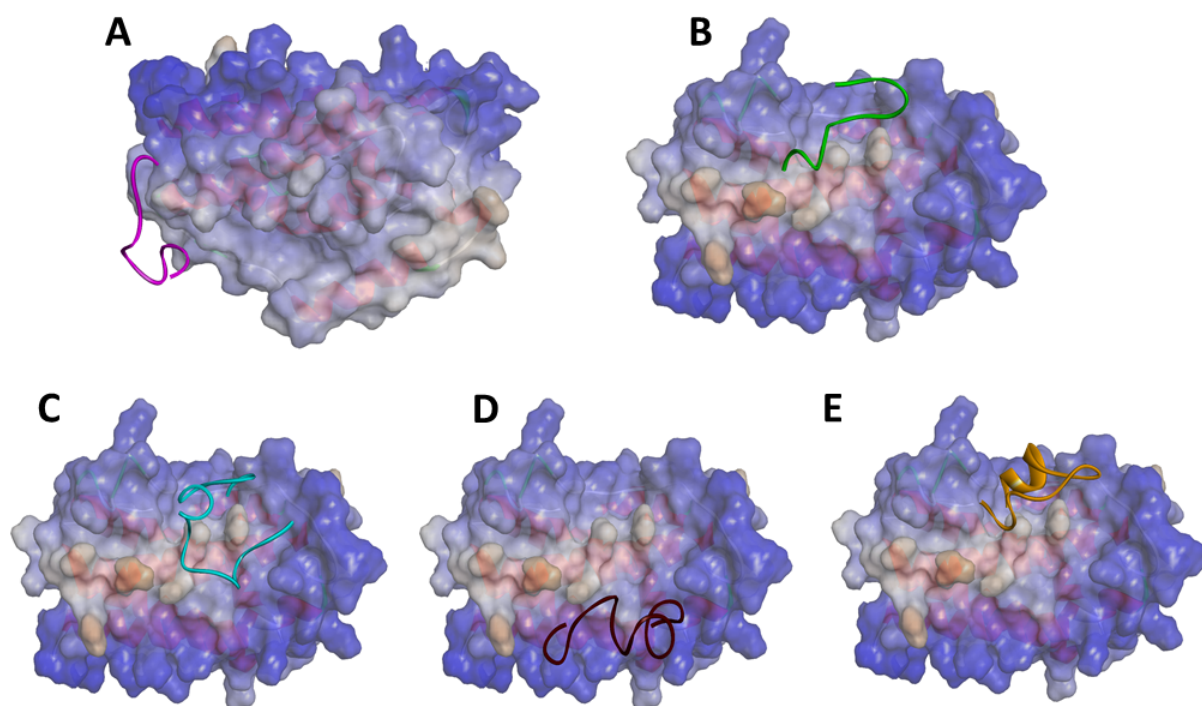

**Figure S2.** Final conformations and poses of the interactions between IL-6 and the peptides after docking : (A) CTE17, (B) CAY15, (C) CSE25, (D) CGF24 and (E) SGC20.

## 4. RMSD

### CTE17/IL-6

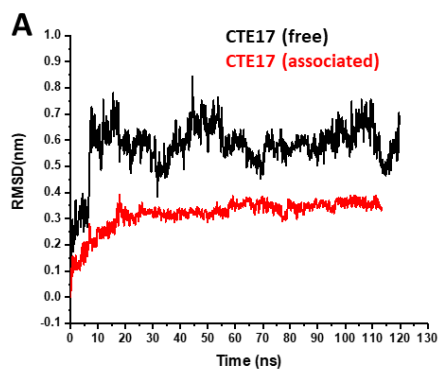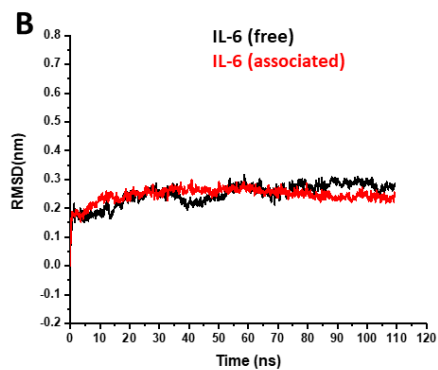

### CAY15/IL-6

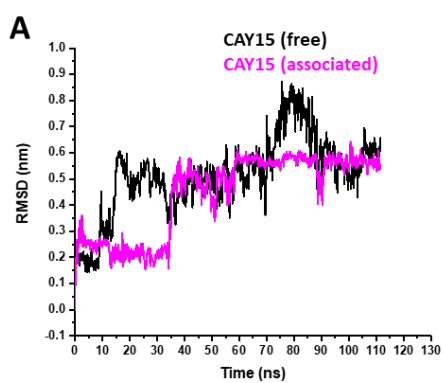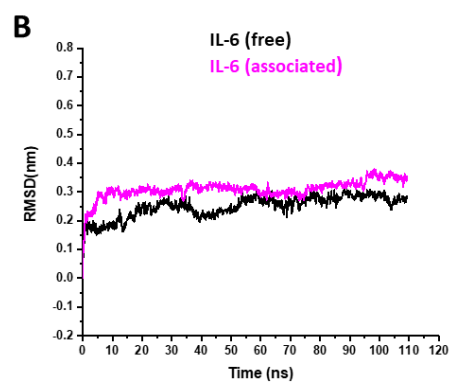

### CSE25/IL-6

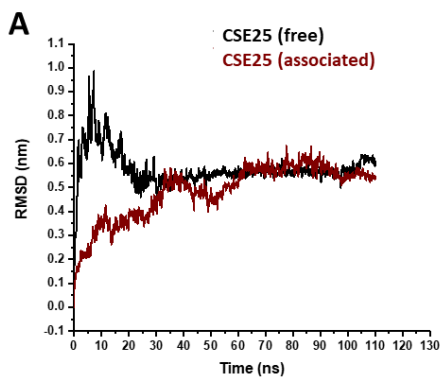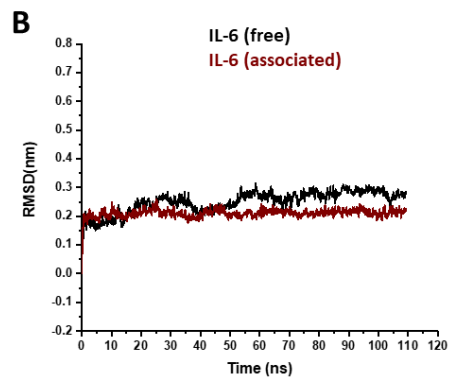

## CGF24/IL-6

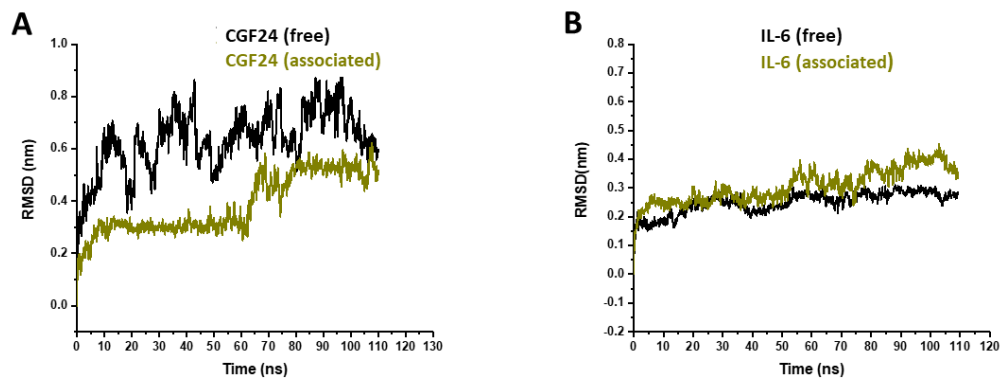

## SGC20/IL-6

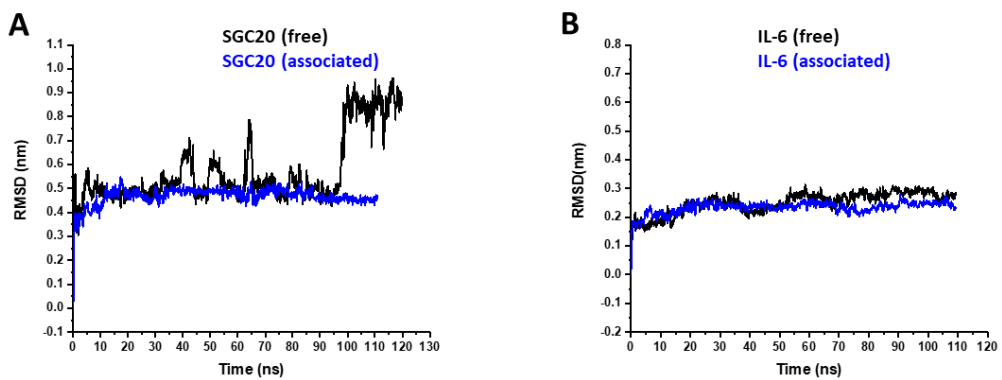

**Figure S3.** RMSD plots IL-6 and peptides during 110 ns MD simulation. (A) free peptide and associated peptide, (B) free IL-6 and associated IL-6.

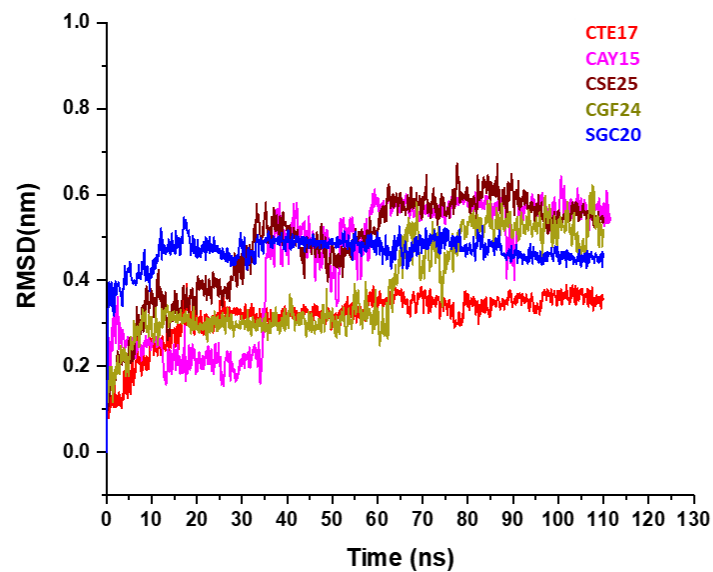

**Figure S4.** RMSD plots of associated peptides during the simulation time.

## 5. Radius of Gyration

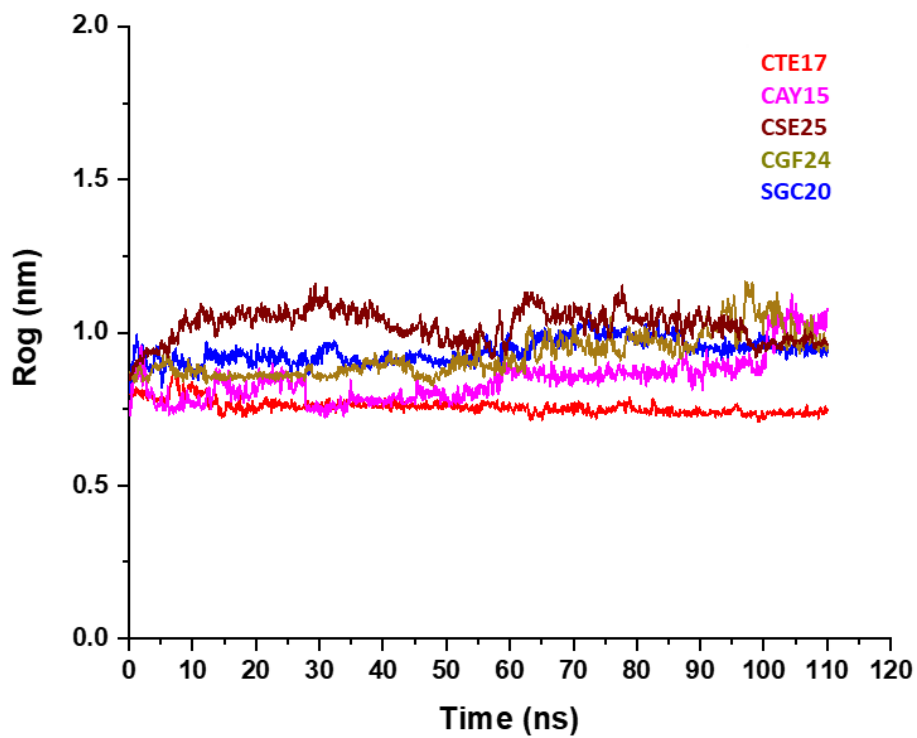

**Figure S5.** RoG plots of associated peptides during simulation time.



## 6. Hydrogen Bonds

**Table S2.** Interactions between the protein and the peptides during the 110 ns MD simulation. The relative frequency of the detected interactions H-bonds.

### CTE17/IL-6

| Donor       | Acceptor   | Occupancy |
|-------------|------------|-----------|
| LYS110-Side | GLU17-Side | 32.72%    |
| LYS110-Side | SER4-Main  | 23.63%    |
| ARG06-Side  | ASP14-Side | 31.75%    |
| ASN114-Side | GLU17-Side | 16.75%    |
| ILE15-Main  | LEU01-Main | 14.46%    |

### CAY15/IL-6

| Donor       | Acceptor    | Occupancy |
|-------------|-------------|-----------|
| ARG161-Side | TYR15-Side  | 127.93%   |
| LYS7-Side   | SER151-Side | 38.50%    |
| TYR11-Side  | SER158-Side | 26.59%    |
| LYS7-Side   | GLU154-Side | 56.85%    |
| ASN8-Side   | LEU46-Main  | 32.59%    |
| ASN8-Side   | GLU154-Side | 30.80%    |
| MET47-Main  | ASN8-Side   | 32.14%    |
| SER184-Side | TYR15-Side  | 25.07%    |
| TYR9-Side   | GLU51-Side  | 62.22%    |
| ARG5-Side   | GLU37-Side  | 93.82%    |

### CSE25/IL-6

| Donor       | Acceptor   | Occupancy |
|-------------|------------|-----------|
| SER158-Side | GLU19-Side | 10.57%    |
| ARG150-Side | GLU25-Side | 100.89%   |
| ARG22-Side  | ASP6-Side  | 89.79%    |
| CYS1-Main   | GLU37-Side | 19.98%    |
| ARG162-Side | ASP8-Side  | 59.06%    |
| ARG150-Side | ASP21-Side | 12.79%    |
| SER19-Side  | ASP6-Side  | 40.94%    |
| ARG22-Side  | ASP6-Main  | 18.12%    |
| GLU33-Main  | SER2-Main  | 12.79%    |
| ARG164-Side | ASP8-Side  | 54.35%    |
| LYS153-Side | ASP6-Side  | 20.60%    |
| ARG161-Side | ASP21-Side | 14.39%    |
| LYS153-Side | GLU24-Side | 12.26%    |
| ARG161-Side | GLU19-Side | 11.99%    |

**CGF24/IL-6**

| <b>Donor</b> | <b>Acceptor</b> | <b>Occupancy</b> |
|--------------|-----------------|------------------|
| ARG12-Side   | PHE24-Side      | 14.59%           |
| ALA3-Main    | GLU33-Side      | 12.01%           |
| ASN4-Main    | GLU33-Side      | 25.53%           |
| SER19-Side   | ASP6-Side       | 17.88%           |
| ASN5-Main    | GLU33-Side      | 26.87%           |
| ARG22-Side   | ASP6-Side       | 102.58%          |
| LYS153-Side  | SER15-Main      | 12.01%           |
| ARG17-Side   | GLU37-Side      | 29.63%           |
| SER15-Side   | GLN157-Side     | 10.68%           |
| ARG161-Side  | PHE24-Side      | 20.82%           |
| ARG17-Side   | GLU41-Side      | 55.69%           |
| CYS1-Main    | GLU33-Side      | 12.90%           |

**SGC20/IL-6**

| <b>Donor</b> | <b>Acceptor</b> | <b>Occupancy</b> |
|--------------|-----------------|------------------|
| GLU51-Main   | SER6-Side       | 39.51%           |
| ARG12-Side   | CYS20-Side      | 52.93%           |
| ARG9-Side    | GLU51-Side      | 12.06%           |
| ARG161-Side  | GLY16-Main      | 16.74%           |
| SER19-Side   | CYS20-Side      | 10.62%           |
| ARG22-Side   | CYS20-Side      | 31.32%           |
| ARG12-Side   | ASP19-Main      | 12.96%           |
| LYS153-Side  | CYS20-Side      | 13.50%           |
| ARG61        | ALA13-Main      | 10.53%           |

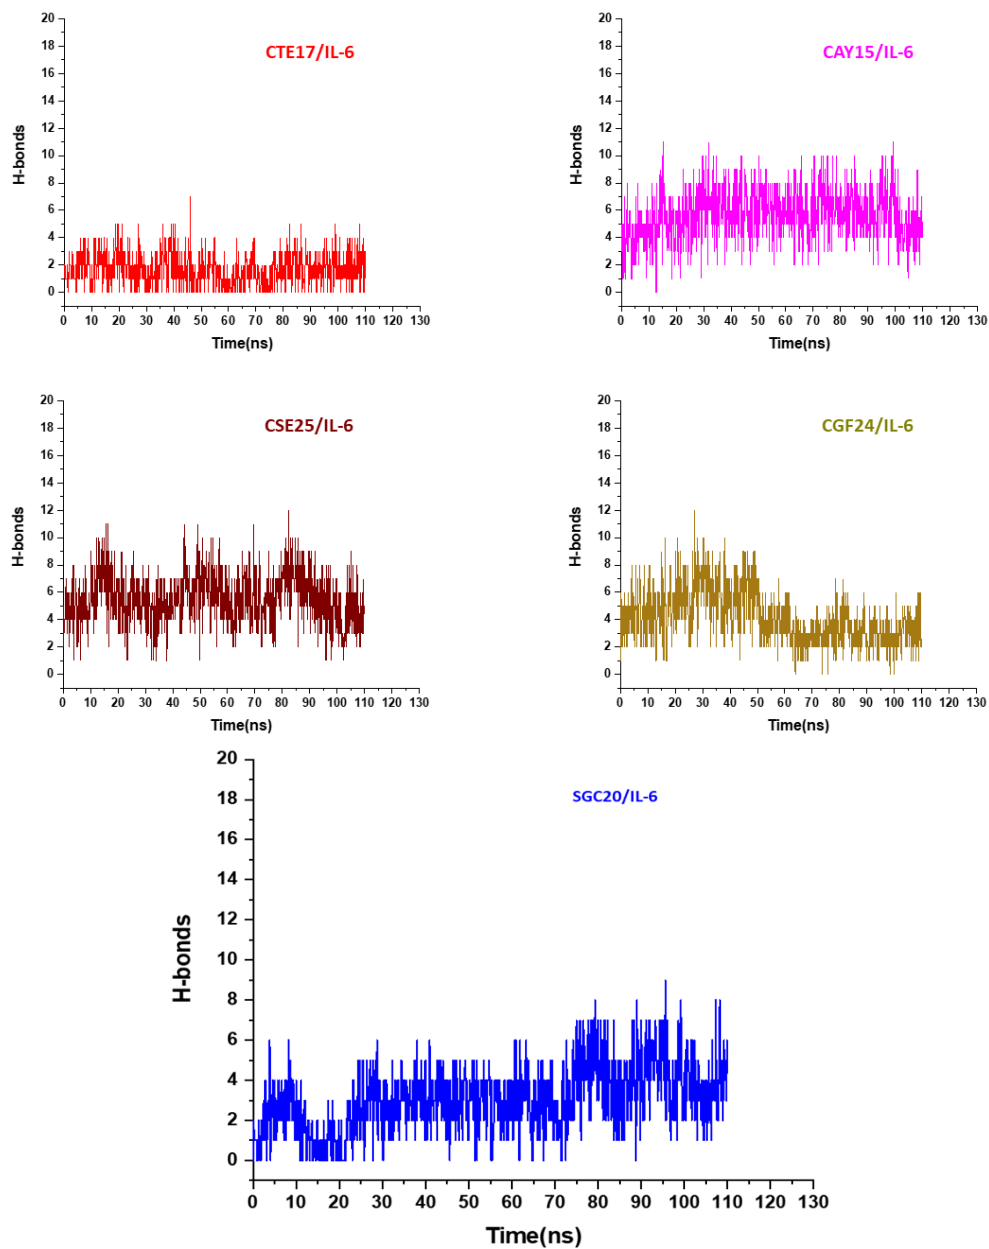

**Figure S6.** Number of hydrogen bonding interactions between IL-6 and the different peptides during 110 ns MD simulation for : CTE17/IL-6, CAY15/IL-6, CSE25/IL-6, CGF24/IL-6, SGC20/IL-6.

## 7. Hydrophobic interactions and salt bridges

**Table S3.** Interactions between the protein and the peptides during the last 40 ns MD simulation. The relative score of the detected hydrophobic and salt bridge interactions.

### CTE17/IL-6

| Contact                         | Type        | Score |
|---------------------------------|-------------|-------|
| ARG25-NH2-IL-6_ASP14-CG-CTE17   | Salt bridge | 67%   |
| ARG25-NH2-IL-6_ASP14-OD1-CTE17  | Salt bridge | 67%   |
| ARG25-NH2-IL-6_ASP14-OD2-CTE17  | Salt bridge | 67%   |
| LYS129-NZ-IL-6_GLU17-OT1-CTE17  | Salt bridge | 57%   |
| LYS129-NZ-IL-6_GLU17-OT2-CTE17  | Salt bridge | 51%   |
| PHE126-CZ-IL-6_ILE12-CG2-CTE17  | hydrophobic | 66%   |
| PHE126-CE2-IL-6_ILE12-CG2-CTE17 | hydrophobic | 63%   |

### CAY15/IL-6

| Contact                       | Type        | Score |
|-------------------------------|-------------|-------|
| GLU56-CD-IL-6_ARG5-NH2-CAY15  | Salt bridge | 77%   |
| GLU56-CD-IL-6_ARG5-NE-CAY15   | Salt bridge | 50%   |
| GLU56-OE1-IL-6_ARG5-NH2-CAY15 | Salt bridge | 76%   |
| GLU56-OE1-IL-6_ARG5-NE-CAY15  | Salt bridge | 52%   |
| GLU56-OE1-IL-6_ARG5-CZ-CAY15  | Salt bridge | 66%   |
| GLU56-OE2-IL-6_ARG5-NH2-CAY15 | Salt bridge | 76%   |
| GLU56-OE2-IL-6_ARG5-NE-CAY15  | Salt bridge | 55%   |
| GLU56-OE2-IL-6_ARG5-CZ-CAY15  | Salt bridge | 67%   |
| GLU173-CD-IL-6_LYS7-NZ-CAY15  | Salt bridge | 76%   |
| GLU173-OE1-IL-6_LYS7-NZ-CAY15 | Salt bridge | 70%   |
| GLU173-OE2-IL-6_LYS7-NZ-CAY15 | Salt bridge | 75%   |
| GLU173-OE2-IL-6_LYS7-CE-CAY15 | Salt bridge | 52%   |
| MET68-CB-IL-6_TYR9-CE2-CAY15  | hydrophobic | 67%   |
| PHE75-CG-IL-6_TYR15-OH-CAY15  | hydrophobic | 50%   |
| PHE75-CZ-IL-6_TYR15-OH-CAY15  | hydrophobic | 55%   |
| PHE75-CD2-IL-6_TYR15-OH-CAY15 | hydrophobic | 64%   |
| PHE75-CE2-IL-6_TYR15-OH-CAY15 | hydrophobic | 63%   |

### CSE25/IL-6

| Contact                       | Type        | Score |
|-------------------------------|-------------|-------|
| ARG41-CZ-IL-6_ASP6-OD1-CSE25  | Salt bridge | 74%   |
| ARG41-CZ-IL-6_ASP6-OD2-CSE25  | Salt bridge | 80%   |
| ARG41-NH1-IL-6_ASP6-CG-CSE25  | Salt bridge | 72%   |
| ARG41-NH1-IL-6_ASP6-OD1-CSE25 | Salt bridge | 85%   |
| ARG41-NH1-IL-6_ASP6-OD2-CSE25 | Salt bridge | 78%   |
| ARG41-NH2-IL-6_ASP6-CG-CSE25  | Salt bridge | 87%   |
| ARG41-NH2-IL-6_ASP6-OD1-CSE25 | Salt bridge | 84%   |
| ARG41-NH2-IL-6_ASP6-OD2-CSE25 | Salt bridge | 94%   |

|                                 |             |     |
|---------------------------------|-------------|-----|
| ARG169-CZ-IL-6_GLU25-OT1-CSE25  | Salt bridge | 72% |
| ARG169-CZ-IL-6_GLU25-OT2-CSE25  | Salt bridge | 73% |
| ARG169-NH1-IL-6_GLU24-CB-CSE25  | Salt bridge | 50% |
| ARG169-NH1-IL-6_GLU25-OT1-CSE25 | Salt bridge | 84% |
| ARG169-NH1-IL-6_GLU25-OT2-CSE25 | Salt bridge | 82% |
| ARG169-NH2-IL-6_GLU25-OT2-CSE25 | Salt bridge | 84% |
| LYS172-CE-IL-6_GLU24-OE1-CSE25  | Salt bridge | 51% |
| LYS172-CE-IL-6_ASP6-OD1-CSE25   | Salt bridge | 61% |
| LYS172-NZ-IL-6_ASP6-OD1-CSE25   | Salt bridge | 68% |
| LYS172-NZ-IL-6_GLU24-OE1-CSE25  | Salt bridge | 53% |
| ARG183-CZ-IL-6_ASP8-CG-CSE25    | Salt bridge | 54% |
| ARG183-CZ-IL-6_ASP8-OD1-CSE25   | Salt bridge | 85% |
| ARG183-CZ-IL-6_ASP8-OD2-CSE25   | Salt bridge | 85% |
| ARG183-NH1-IL-6_ASP8-CG-CSE25   | Salt bridge | 87% |
| ARG183-NH1-IL-6_ASP8-OD1-CSE25  | Salt bridge | 92% |
| ARG183-NH1-IL-6_ASP8-OD2-CSE25  | Salt bridge | 92% |
| ARG183-NH2-IL-6_ASP8-CG-CSE25   | Salt bridge | 93% |
| ARG183-NH2-IL-6_ASP8-OD1-CSE25  | Salt bridge | 95% |
| ARG183-NH2-IL-6_ASP8-OD2-CSE25  | Salt bridge | 96% |
| ARG169-NH2-IL-6_GLU25-OT1-CSE25 | Salt bridge | 80% |

### CGF24/IL-6

| Contact                       | Type        | Score |
|-------------------------------|-------------|-------|
| ARG41-NE-IL-6_ASP6-CG-CGF24   | Salt bridge | 85%   |
| ARG41-NE-IL-6_ASP6-OD1-CGF24  | Salt bridge | 93%   |
| ARG41-NE-IL-6_ASP6-OD2-CGF24  | Salt bridge | 84%   |
| ARG41-CZ-IL-6_ASP6-CG-CGF24   | Salt bridge | 56%   |
| ARG41-CZ-IL-6_ASP6-OD1-CGF24  | Salt bridge | 89%   |
| ARG41-CZ-IL-6_ASP6-OD2-CGF24  | Salt bridge | 83%   |
| ARG41-NH2-IL-6_ASP6-CG-CGF24  | Salt bridge | 94%   |
| ARG41-NH2-IL-6_ASP6-OD1-CGF24 | Salt bridge | 96%   |
| ARG41-NH2-IL-6_ASP6-OD2-CGF24 | Salt bridge | 96%   |

### SGC20/IL-6

| Contact                       | Type        | Score |
|-------------------------------|-------------|-------|
| ARG31-NH2-IL-6_ASP19-CB-SGC20 | Salt bridge | 53%   |
| MET68-CG-IL-6_PHE3-CE1-SGC20  | hydrophobic | 63%   |
| PHE75-CB-IL-6_PHE3-CE2-SGC20  | hydrophobic | 58%   |
| PHE75-CD2-IL-6_PHE3-CD2-SGC20 | hydrophobic | 57%   |

## 8. CTE17/IL-6/CSE25 Sandwich System

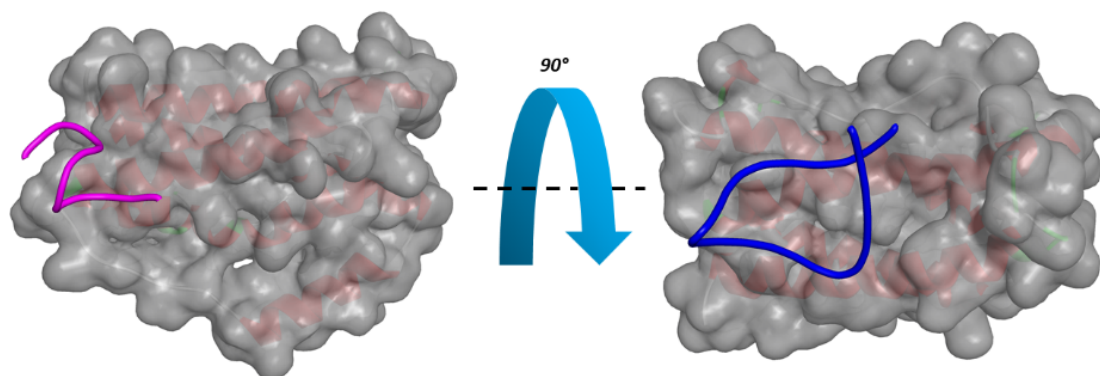

**Figure S7.** Final conformations and positions for CTE17 (magenta) and CSE25 (blue) extracted from the last frame of CTE17/IL-6 and CSE25/IL-6 MD simulations.

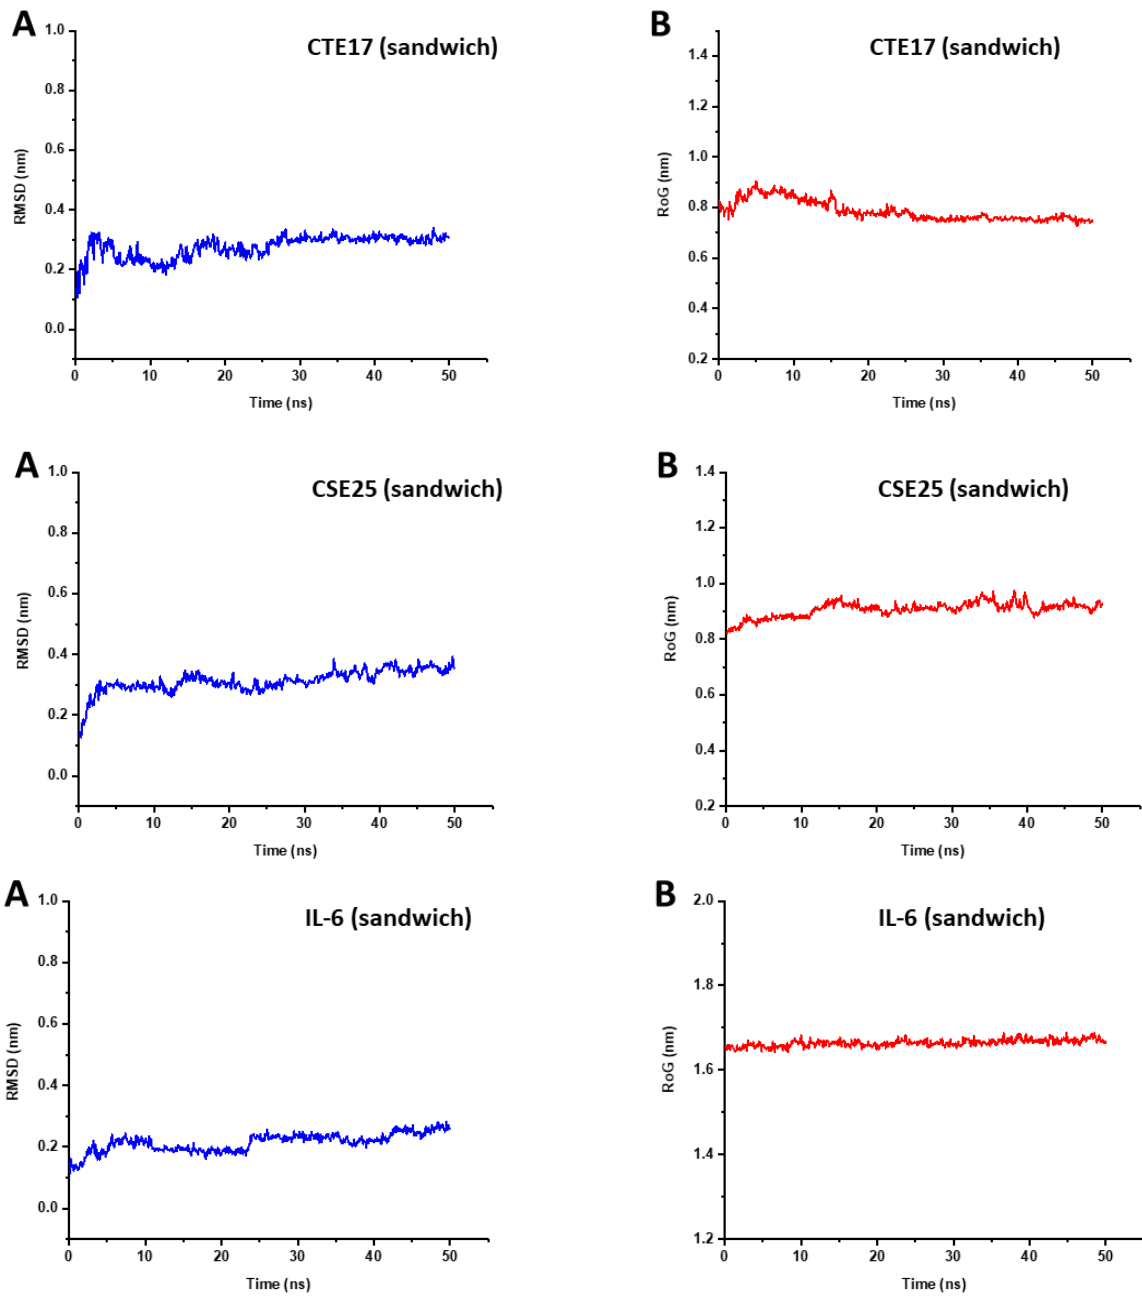

**Figure S8.** A) RMSD and B) RoG of the protein and peptides in sandwich system during 50 ns MD simulation.

## 9. Selectivity

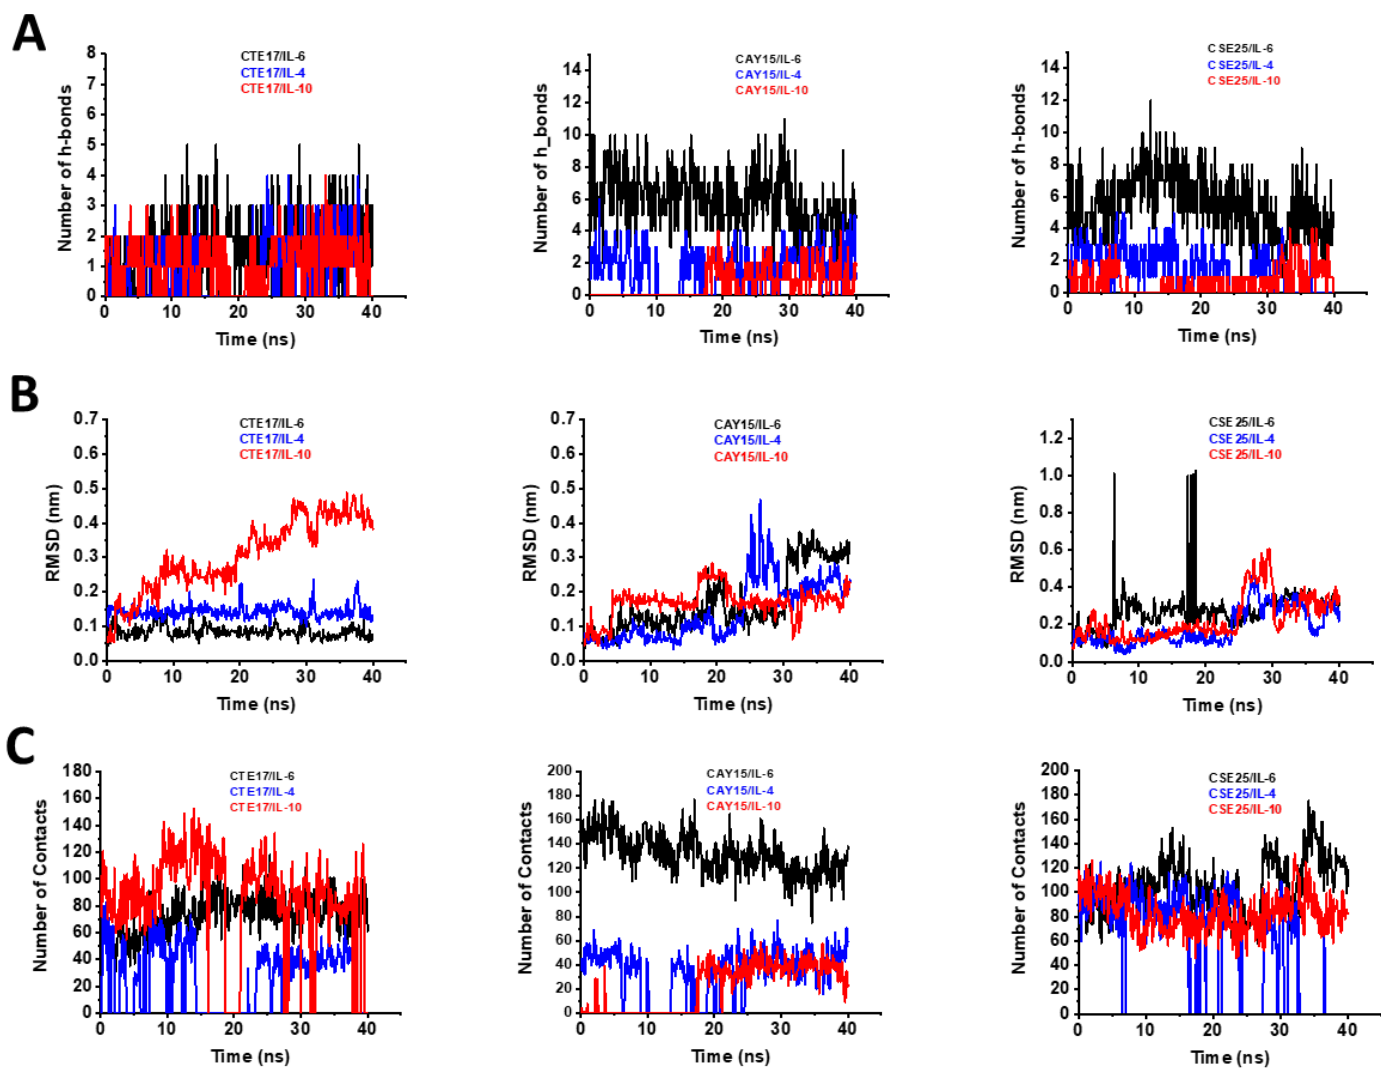

**Figure S9.** A) Number of h-bonds, B) RMSD and C) Number of contacts between the proteins and peptides during the last 40 ns of the MD simulation time.



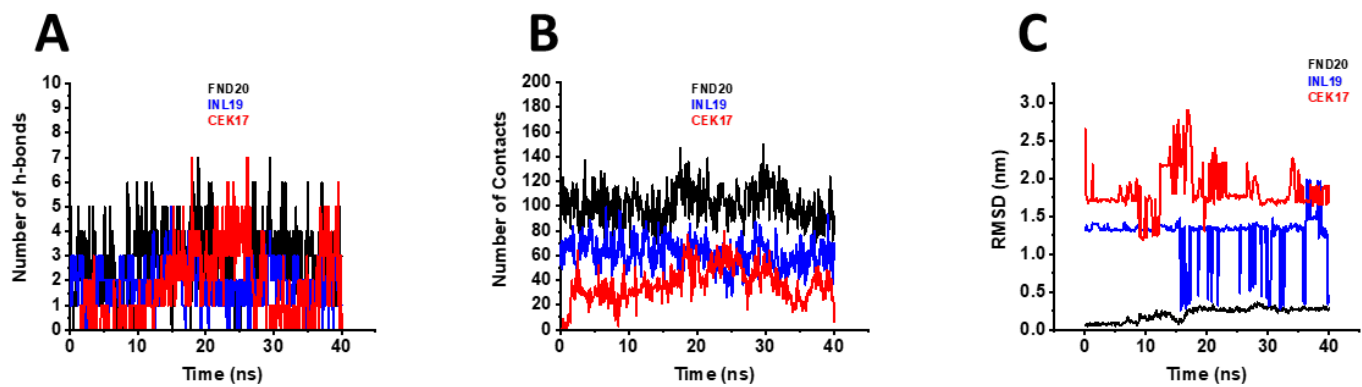

**Figure S10.** A) Number of h-bonds, B) RMSD and C) Number of contacts between the IL-6 and peptides during the last 40 ns of the MD simulation time.

**Table S4.** Comparison between the peptides associated with IL-6 during the last 40 ns of the MD simulation time.

| <b>Peptides</b> | <b>RMSD (nm)</b> | <b>Number of h-bonds</b> | <b>Number of contacts</b> | <b>Energy (kcal.mol<sup>-1</sup>)</b> |
|-----------------|------------------|--------------------------|---------------------------|---------------------------------------|
| FND20           | 2.13             | 2.8                      | 101                       | -96.56                                |
| INL19           | 12.61            | 1.8                      | 61                        | -12.52                                |
| CEK17           | 18.34            | 1.8                      | 36                        | -4.03                                 |
